# Supplementary material
Source: ML conference proceedings conference paper supplement (https://openreview.net/forum?id=ZR3JAjWAom)
Supplement: supplementary_material [file attachment]

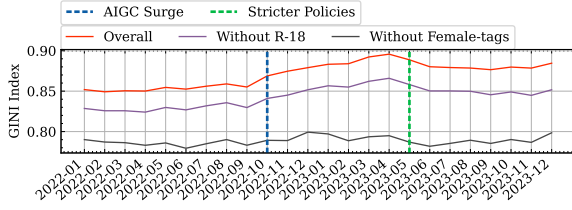

**Figure 6: Monthly Gini index for tags on the number of artworks associated with the tag.**

## A ETHICS

This study is approved by the institutional review board (IRB). All the data used in this paper is publicly available to any ordinary Pixiv user. Personal information may be present in user profiles, but it is important to note that it is the user who voluntarily provided and chose to make it public. We do not analyze any specified user nor do we attempt to link these Pixiv accounts to real personal identities. Instead, we aggregate the data to gain a high-level understanding.

Furthermore, it is worth noting that our analysis does not involve using artwork (images) created by Pixiv users for either data analysis or machine learning model training. Instead, we rely on metadata such as tags, views, and bookmarks. Again, we emphasize that we do not perform analysis on any specific artwork, and only aggregate the data to gain an overall understanding. This approach ensures that we do not prejudice the interests of creators.

## B TAGS

### B.1 Excluded Tags

When analyzing tags, we exclude two types of tags that contain meta-information, which can affect our analysis. The first type is AI-generated related tags, and the excluded tags are listed in Table 1. The second type includes tags that explicitly display the number of bookmarks, such as "10000users 入り", indicating that the tagged artwork has more than 10000 bookmarks. Therefore, we exclude all tags with "users 入り". In Section §6.2, our focus is on popular themes. Recall, tags are free-text. To eliminate the impact of tags that are seldom used, we only consider tags that are associated with at least 0.01% of the AI-generated or human-generated artworks.

|                  |                  |                  |                  |
|------------------|------------------|------------------|------------------|
| AI               | AI-generated     | AIart            | AIartist         |
| AIartwork        | AIdrawing        | AIアート            | AIイラスト           |
| AI グラビア          | AI作成             | AI作画             | AI生成             |
| AI画像生成           | AI絵              | AI絵描き            | AI画              |
| Ai               | AiArt            | Aiイラスト           | Ai画              |
| NOVELAI          | NovelAI          | NovelAIDiffusion | NovelAIdiffusion |
| NovelAi          | NovelAiDiffusion | StableDiffusion  | WaifuDiffusion   |
| discodiffusion   | novelAI          | novelaidiffusion | stable-diffusion |
| stable_diffusion | stablediffusion  | waiufidiffusion  |                  |
| 画像生成AI           | 手作業加筆修正済みAI絵     |                  |                  |

**Table 1: Excluded AI-related Tags**

### B.2 Tag Rankings

We calculate monthly rankings for tags. Table 2 displays the top 90 tags for 2022-04, 2022-07, 2022-10, 2023-01, and 2023-04. The

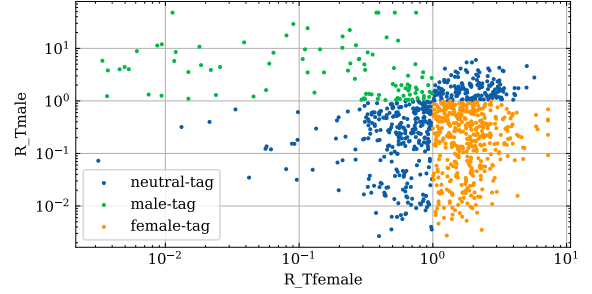

**Figure 7:  $R_{Tmale}$  vs.  $R_{Tfemale}$  for the top 1000 tags.**

numbers in parentheses indicate the change of the rank.

**Caution: The table contains explicit sexual words.** For transparency, we decide to present the tags in their original form.

### B.3 Tag Classification

- (1) Choose two sets of ground truth tags, labeled as  $S_1$  and  $S_2$ .
- (2) Calculate the percentage of artworks that have tags in  $S_1$  and  $S_2$ , respectively, out of all artworks. These percentages are denoted as  $P_1$  and  $P_2$ .
- (3) For each individual tag  $T$ , calculate the percentage of artworks that have tags in  $S_1$  and  $S_2$ , respectively, out of all artworks that have  $T$ . These percentages are denoted as  $P_{T1}$  and  $P_{T2}$ .
- (4) Calculate the ratios  $R_{T1} = P_{T1}/P_1$  and  $R_{T2} = P_{T2}/P_2$ .

Intuitively, if  $R_{T1} > 1$ , this means that tags in  $S_1$  appear more frequently in artworks with tag  $T$  than average, indicating a higher likelihood of similarity in type. The same applies for  $R_{T2}$ . Now we classify tags into male-tags and female-tags. We choose

- $S_{male} = \{\text{'男の子', '腐向け', '少年', 'boy', 'シ ョ タ'}\}$
- $S_{female} = \{\text{'女の子', 'ロ リ', '百合', '少女', 'girl'}\}$

We then calculate  $R_{Tmale}$  and  $R_{Tfemale}$  for each tag in the top 1000 tags. For a tag  $T$ , if  $R_{Tmale} > 1$  and  $R_{Tfemale} < 1$ , we classify it into male-tags. If  $R_{Tmale} < 1$  and  $R_{Tfemale} > 1$ , we classify it into female-tags. The result is plotted in Figure 7.

|      | 2022-04            | 2022-07              | 2022-10              | 2023-01              | 2023-04               |      |
|------|--------------------|----------------------|----------------------|----------------------|-----------------------|------|
| 1277 | Rank               |                      |                      |                      |                       | 1335 |
| 1278 | 1 R-18             | R-18 (=)             | R-18 (=)             | R-18 (=)             | R-18 (=)              | 1336 |
| 1279 | 2 オリジナル            | オリジナル (=)            | オリジナル (=)            | 女の子 (+1)             | 女の子 (=)               | 1337 |
|      | 3 女の子              | 女の子 (=)              | 女の子 (=)              | オリジナル (-1)           | オリジナル (=)             |      |
| 1280 | 4 漫画               | 漫画 (=)               | 漫画 (=)               | おっぱい (+1)            | おっぱい (+1)             | 1338 |
|      | 5 おっぱい             | おっぱい (=)             | おっぱい (=)             | 巨乳 (+1)              | おっぱい (-1)             |      |
| 1281 | 6 イラスト             | イラスト (=)             | 巨乳 (+2)              | 漫画 (-2)              | 漫画 (=)                | 1339 |
| 1282 | 7 創作               | 原神 (+2)              | 原神 (=)               | イラスト (+1)            | 少女 (+5)               | 1340 |
|      | 8 巨乳               | 巨乳 (=)               | イラスト (-2)            | 原神 (-1)              | 原神 (=)                |      |
|      | 9 原神               | 水着 (+27)             | ハロウィン (new)          | 創作 (+2)              | girl (+5)             | 1341 |
| 1283 | 10 アナログ            | 創作 (-3)              | ロリ (+13)             | ロリ (=)               | ロリ (=)                | 1342 |
|      | 11 バーチャルYouTuber   | バーチャルYouTuber (=)    | 創作 (-1)              | GenshinImpact (+7)   | イラスト (-4)             |      |
| 1284 | 12 ウマ娘プリティーダービー    | ホロライブ (+1)           | 少女 (+10)             | 少女 (=)               | 美少女 (+26)             | 1343 |
|      | 13 ホロライブ           | アナログ (-3)            | 東方 (+2)              | パニーガール (+74)         | ブルーアーカイブ (+3)         |      |
| 1285 | 14 ボケモン            | ウマ娘プリティーダービー (-2)    | アナログ (-1)            | girl (+5)            | GenshinImpact (-3)    | 1344 |
| 1286 | 15 東方              | 東方 (=)               | バーチャルYouTuber (-4)   | ボケモン (+6)            | 創作 (-6)               |      |
|      | 16 ウマ娘             | VTuber (+2)          | ブルーアーカイブ (+9)        | ブルーアーカイブ (=)         | 魅惑の谷間 (+6)            | 1345 |
| 1287 | 17 fanart          | GenshinImpact (+7)   | ホロライブ (-5)           | バーチャルYouTuber (-2)   | 魅惑のふともも (+14)         | 1346 |
| 1288 | 18 VTuber          | ボケモン (-4)            | GenshinImpact (-1)   | 東方 (-5)              | 水着 (+5)               |      |
|      | 19 オリキャラ           | オリキャラ (=)            | girl (+5)            | ホロライブ (-2)           | 爆乳 (+1)               | 1347 |
| 1289 | 20 少女              | fanart (-3)          | ウマ娘プリティーダービー (-6)    | 爆乳 (+2)              | 制服 (+22)              |      |
|      | 21 ロリ              | ウマ娘 (-5)             | ボケモン (-3)            | VTuber (+2)          | 極上の乳 (+16)            | 1348 |
| 1290 | 22 girl            | 少女 (-2)              | 爆乳 (+8)              | 魅惑の谷間 (+55)          | ブルアカ (+17)            |      |
|      | 23 R-18G           | ロリ (-2)              | VTuber (-7)          | 水着 (+4)              | バーチャルYouTuber (-6)    | 1349 |
| 1291 | 24 GenshinImpact   | girl (-2)            | オリキャラ (-5)           | アナログ (-10)           | ホロライブ (-5)            |      |
|      | 25 illustration    | ブルーアーカイブ (+4)        | R-18G (+1)           | オリキャラ (-1)           | R-18G (+1)            | 1350 |
| 1292 | 26 コイカツ            | R-18G (-3)           | fanart (-6)          | R-18G (-1)           | VTuber (-5)           |      |
|      | 27 3DCG            | コイカツ (-1)            | 水着 (-18)             | ほっち・ざ・ろっく! (new)     | 東方 (-9)               | 1351 |
| 1293 | 28 ケモノ             | illustration (-3)    | ウマ娘 (-7)             | ウマ娘プリティーダービー (-8)    | ウマ娘プリティーダービー (=)      | 1352 |
| 1294 | 29 ブルーアーカイブ        | 3DCG (-2)            | illustration (-1)    | fanart (-3)          | ボケモン (-14)            |      |
|      | 30 original        | 爆乳 (+1)              | コイカツ (-3)            | 東方Project (+1)       | 3DCG (+5)             | 1353 |
| 1295 | 31 爆乳              | ケモノ (-3)             | 東方Project (+2)       | 魅惑のふともも (+44)        | アナログ (-7)             |      |
| 1296 | 32 落書き             | ふともも (+118)          | ケモノ (-1)             | ウマ娘 (-4)             | 金髪 (+26)              | 1354 |
|      | 33 東方Project       | 東方Project (=)        | 3DCG (-4)            | illustration (-4)    | ウマ娘 (-1)              |      |
| 1297 | 34 うごイラ            | にじさんじ (+6)           | Fate/GrandOrder (+1) | コイカツ (-4)            | fanart (-5)           | 1355 |
|      | 35 腐向け             | Fate/GrandOrder (+4) | FGO (+2)             | 3DCG (-2)            | オリキャラ (-10)           |      |
| 1298 | 36 水着              | 落書き (-4)             | OC (+3)              | ケモノ (-4)             | 極上の女体 (+47)           | 1356 |
|      | 37 OC              | FGO (+1)             | loli (+48)           | 極上の乳 (+22)           | 中出し (+6)              |      |
| 1299 | 38 FGO             | original (-8)        | 百合 (+13)             | 美少女 (+26)            | 女子高生 (+22)            | 1357 |
|      | 39 Fate/GrandOrder | OC (-2)              | 拘束 (+9)              | ブルアカ (+1)            | BlueArchive (+66)     | 1358 |
| 1300 | 40 にじさんじ           | hololive (+2)        | ブルアカ (+15)           | Fate/GrandOrder (-6) | illustration (-7)     |      |
|      | 41 男子の             | うごイラ (-7)            | うごイラ (=)             | 百合 (-3)              | loli (-13)            | 1359 |
| 1301 | 42 hololive        | 腐向け (-7)             | hololive (-2)        | 制服 (+12)             | 黒髪 (+31)              |      |
|      | 43 拘束              | 初音ミク (+8)            | original (-5)        | 中出し (+3)             | sexy (+55)            | 1360 |
| 1302 | 44 艦これ             | anime (+3)           | チェンソーマン (+78)        | FGO (-9)             | anime (+9)            | 1361 |
|      | 45 明日方舟            | ピキニ (+133)           | anime (-1)           | hololive (-3)        | 東方Project (-15)       |      |
| 1303 | 46 アークナイツ          | 明日方舟 (-1)            | 中出し (+21)            | 男子 (-2)              | ケモノ (-10)             | 1362 |
|      | 47 anime           | 男子 (-6)              | 初音ミク (-4)            | original (-4)        | ふともも (+32)            | 1363 |
| 1304 | 48 furry           | 拘束 (-5)              | 男子 (-1)              | OC (-12)             | 百合 (-7)               |      |
|      | 49 SPY×FAMILY      | 艦これ (-5)             | 落書き (-13)            | 拘束 (-10)             | 拘束 (=)                | 1364 |
| 1305 | 50 制服              | アークナイツ (-4)          | 腐向け (-8)             | うさぎ (new)            | hololive (-5)         |      |
|      | 51 初音ミク            | 百合 (+1)              | 艦これ (-2)             | うごイラ (-10)           | ピキニ (+38)             | 1365 |
| 1306 | 52 百合              | furry (-4)           | pixivファンタジーSOZ (new) | ボケモンSV (new)         | original (-5)         | 1366 |
|      | 53 ふたなり            | うちの子 (+3)            | 水星の魔女 (new)          | anime (-8)           | Fate/GrandOrder (-13) |      |
| 1307 | 54 アイドルマスター        | VOCALOID (+13)       | 制服 (+2)              | loli (-17)           | コイカツ (-20)            | 1367 |
|      | 55 シンデレラガールズ       | ブルアカ (+33)           | furry (-3)           | 年賀状 (new)            | JK (+46)              | 1368 |
| 1308 | 56 art             | 制服 (-6)              | 風景 (+2)              | furry (-1)           | cute (+18)            |      |
| 1309 | 57 風景              | 裸足 (+3)              | 明日方舟 (-11)           | 明日方舟 (=)             | FGO (-13)             | 1369 |
|      | 58 ショタ             | 風景 (-1)              | 鑑耳 (+45)             | 金髪 (+20)             | Realistic (new)       | 1370 |
| 1310 | 59 中出し             | Vtuber (+4)          | 極上の乳 (+19)           | むちむち (+8)            | パニーガール (-46)          |      |
|      | 60 裸足              | ふたなり (-7)            | ショタ (+6)             | 女子高生 (+36)           | 男子 (-14)              | 1371 |
| 1311 | 61 艦隊これくしょん        | おへそ (+32)            | ふたなり (-1)            | 全裸 (+2)              | pixiv今日のお題 (+32)      |      |
|      | 62 commission      | アズールレーン (+6)         | アークナイツ (-12)         | ショタ (-2)             | 露出 (+20)              | 1372 |
| 1312 | 63 Vtuber          | art (-8)             | 全裸 (+12)             | 艦これ (-12)            | うごイラ (-12)            |      |
| 1313 | 64 原               | アイドルマスター             | 美少女 (+47)            | アークナイツ (-2)          | 全裸 (-3)               | 1373 |
|      | 65 nsfw            | 夏 (new)              | うちの子 (-12)           | ファンタジー (+20)         | 鑑耳 (+20)              | 1374 |
| 1314 | 66 コイカツ!           | ショタ (-8)             | にじさんじ (-32)          | 落書き (-17)            | 風景 (+10)              |      |
| 1315 | 67 VOCALOID        | 中出し (-8)             | むちむち (+24)           | うちの子 (-2)            | ファンタジー (-2)           | 1375 |
|      | 68 アズールレーン         | 艦隊これくしょん (-7)        | art (-5)             | 腐向け (-18)            | 貧乳 (+9)               | 1376 |
| 1316 | 69 3D              | commission (-7)      | アイドルマスター             | 後藤ひとり (new)          | むちむち (-10)            |      |
| 1317 | 70 桜               | プロセカ (+7)            | シンデレラガールズ            | (-5)                 | 3D (+3)               | 1377 |
| 1318 | 71 スパイファミリー        | 3D (-2)              | ONEPIECE (+83)       | にじさんじ (-4)           | 明日方舟 (-13)            |      |
|      | 72 パニーガール          | nsfw (-7)            | VOCALOID (-17)       | 着物 (new)             | 初音ミク (+1)             | 1378 |
| 1319 | 73 4コマ             | コイカツ! (-7)           | おへそ (-11)            | 初音ミク (-25)           | OC (-24)              |      |
|      | 74 cute            | ファンアート (+4)          | 背景 (+3)              | 黒髪 (+44)             | 下着 (+22)              | 1379 |
| 1320 | 75 極上の乳            | 全裸 (+7)              | 艦隊これくしょん (-6)        | cute (+8)            | furry (-18)           |      |
|      | 76 oc              | 背景 (+7)              | 魅惑のふともも (+38)        | ふたなり (-14)           | メイド (+24)             | 1380 |
| 1321 | 77 プロセカ            | SPY×FAMILY (-28)     | アズールレーン (-14)        | 風景 (-20)             | 腐向け (-8)              |      |
| 1322 | 78 ファンアート          | 極上の乳 (-3)            | 魅惑の谷間 (+10)          | 貧乳 (+13)             | 3D (+3)               | 1381 |
|      | 79 腋               | オリジナルキャラクター (+6)     | 金髪 (+60)             | VOCALOID (-7)        | おへそ (+10)             |      |
| 1323 | 80 鬼滅の刃            | oc (-4)              | 触手 (+40)             | ふともも (+5)            | 推しの子 (new)            | 1382 |
|      | 81 ラブライブ!          | drawing (+3)         | commission (-11)     | 3D (+20)             | Breasts (new)         |      |
| 1324 | 82 全裸              | NTR (+16)            | ワンピース (+88)          | お尻 (+37)             | 裸足 (+3)               | 1383 |
|      | 83 背景              | sexy (+21)           | cute (+15)           | 露出 (+31)             | ふたなり (-7)             |      |
| 1325 | 84 drawing         | 二次創作 (+5)            | スレッタ・マーキュリー (new)    | 極上の女体 (new)          | ショタ (-21)             | 1384 |
|      | 85 オリジナルキャラクター     | loli (+11)           | ふともも (-52)           | 裸足 (+2)              | 魅惑の顔 (+49)            |      |
| 1326 | 86 リョナ             | リョナ (=)              | ファンタジー (+4)          | 鑑耳 (-27)             | 白髪 (+18)              | 1385 |
|      | 87 女子高生            | 魅惑の谷間 (+22)          | 裸足 (-29)             | アズールレーン (-10)        | 艦これ (-23)             |      |
| 1327 | 88 ブルアカ            | 4コマ (-15)            | 原 (+7)               | art (-19)            | アークナイツ (-23)          | 1386 |
|      | 89 二次創作            | ファンタジー (+8)          | 原 (+7)               | おへそ (-16)            | お尻 (-7)               |      |
| 1328 | 90 むちむち            | 尻神様 (+9)             | 褐色 (+39)             | ピキニ (+26)            | パンツ (+20)             | 1387 |
|      |                    |                      | 貧乳 (new)             | チェンソーマン (-46)        | にじさんじ (-20)           | 1388 |

Table 2: Monthly ranking of the top 90 tags.
